# Supplementary material for: Microsatellite Length Scoring by Single Molecule Real Time Sequencing – Effects of Sequence Structure and PCR Regime
Source: PLoS One. 2016 Jul 14;11(7):e0159232. doi: 10.1371/journal.pone.0159232 (PMC4945053; doi:10.1371/journal.pone.0159232)
Supplement: S3 Table — (XLSX) [file pone.0159232.s040.xlsx]

## Sheet: Sheet1
	Default (min 1 pass)	min 3 passes	min 5 passes	min 7 passes	min 10 passes
Number of reads:	39858	39213	37159	34841	31615
Mean Read Length of Insert:	306 bp	304 bp	301 bp	300 bp	300 bp
Read Quality of Insert:	0.9943	0.9952	0.9967	0.9975	0.9981
Mean Number of Passes:	25.74	26.11	27.28	28.64	30.61
